# Supplementary material
Source: HighWire-hosted journal article supplement (https://cmajopen.ca/highwire/filestream/80978/field_highwire_adjunct_files/1/open-2015-0107-2-at.pdf)
Supplement: open-2015-0107-2-at.pdf [file open-2015-0107-2-at.pdf]

**Appendix 2 (as supplied by the authors): Coding definitions for comorbid conditions and outcomes**

| Characteristic or outcome                        | Database             | Codes                                                                                                                                                                                                                                                                                                                                                                                                                                                                                                                           |
|--------------------------------------------------|----------------------|---------------------------------------------------------------------------------------------------------------------------------------------------------------------------------------------------------------------------------------------------------------------------------------------------------------------------------------------------------------------------------------------------------------------------------------------------------------------------------------------------------------------------------|
| Congestive heart failure                         | CIHI-DAD             | <b>ICD-9</b> 428<br><b>ICD-10</b> I50                                                                                                                                                                                                                                                                                                                                                                                                                                                                                           |
| Stroke                                           | CIHI-DAD             | <b>ICD-9</b> 430 431 434 362.3<br><b>ICD-10</b> I60 (except I60.8) I61 I63 I64 H34.1                                                                                                                                                                                                                                                                                                                                                                                                                                            |
| Acute myocardial infarction                      | CIHI-DAD             | <b>ICD-9</b> 410x<br><b>ICD-10</b> I21 I22                                                                                                                                                                                                                                                                                                                                                                                                                                                                                      |
| Coronary artery disease                          | CIHI-DAD             | <b>ICD-9</b> 411 413 414 414.2 414.8 414.9 429.2<br><b>ICD-10</b> I25                                                                                                                                                                                                                                                                                                                                                                                                                                                           |
| Chronic obstructive pulmonary disease            | CIHI-DAD             | <b>ICD-9</b> 4912 4918 4919 4920 4928<br><b>ICD-10</b> J43 J44 J47                                                                                                                                                                                                                                                                                                                                                                                                                                                              |
| Chronic kidney disease                           | CIHI-DAD             | <b>ICD-9</b> 403 404 582 585 587 588 9967 V45.1<br><b>ICD-10</b> I12 N18 Z992 E1023 E1123 E1323 E1423 N0831 N0832 N0833 N0834 N0835 N26                                                                                                                                                                                                                                                                                                                                                                                         |
| Diabetes mellitus                                | CIHI-DAD             | As defined in the Ontario Diabetes Database                                                                                                                                                                                                                                                                                                                                                                                                                                                                                     |
| Major amputation (Ankle, below-knee, above-knee) | CIHI-DAD<br><br>OHIP | <b>CCI</b> 1VC93* 1VG93* 1VQ93*<br>*Excluding records with the following associated primary ICD-10 diagnosis codes: C40 D16 D48.0 D48.1 D48.2 Q65-Q79 S70-S99 T20-T32<br><br>R626, R625, R624, R623                                                                                                                                                                                                                                                                                                                             |
| Minor amputation (Toe, partial-foot)             | CIHI-DAD<br><br>OHIP | <b>CCI</b> 1WE93* 1WI93* 1WJ93* 1WK93* 1WL93* 1WM93* 1WN93*<br>*Excluding records with the following associated primary ICD-10 diagnosis codes: C40 D16 D48.0 D48.1 D48.2 Q65-Q79 S70-S99 T20-T32<br><br>R619, R620, R621, R622                                                                                                                                                                                                                                                                                                 |
| Peripheral arterial bypass surgery               | CIHI-DAD             | <b>CCI</b> 1KG76                                                                                                                                                                                                                                                                                                                                                                                                                                                                                                                |
| Percutaneous transluminal angioplasty            | OHIP                 | J025*<br>*Excluding records with the following associated OHIP diagnosis codes: 435 436 437 584 585 403                                                                                                                                                                                                                                                                                                                                                                                                                         |
| Carotid endarterectomy                           | OHIP                 | R792 N220                                                                                                                                                                                                                                                                                                                                                                                                                                                                                                                       |
| AAA repair                                       | CIHI-DAD<br><br>OHIP | <b>CCI</b> 1KA76, 1KA80, 1KA50GQOA, 1KE50GQOA<br><br>R802 R817 R783 R784 R785 R875                                                                                                                                                                                                                                                                                                                                                                                                                                              |
| Coronary revascularization                       | CIHI-DAD<br><br>OHIP | <b>CCI</b> 1IJ76 1IJ50<br><br>R742 R743 Z434                                                                                                                                                                                                                                                                                                                                                                                                                                                                                    |
| Initiation of dialysis                           | CIHI-DAD<br><br>OHIP | <b>ICD-10</b> T824 Y602 Y612 Y622 Y841 Z490 Z491 Z492 Z992 E10220 E10221 E10222 E10223 E10224 E10229 N180 E11220 E11221 E11222 E11223 E11224 E11229 E13220 E13221 E13222 E13223 E13224 E13229 E14220 E14221 E14222 E14223 E14224 E14229<br><b>CCI</b> 1OT53DATS 1OT53HATS 1OT53LATS 1PZ21HPD4 1PZ21HQBR 1SY55LAFT 7SC59QD 1KY76LA (includes 1KY76LASJ 1KY76LAXXA 1KY76LAXXL 1KY76LAXXN) 1KY80LA (includes 1KY80LAXXA 1KY80LAXXK 1KY80LAXXN) 1KG76MZXXA 1KG76MZXXN<br><br>R849 R850 G323 G324 G336 G325 G326 G327 G860 G862 G863 |

Appendix to: Hussain MA, Lindsay TF, Mamdani M, et al. Sex differences in the outcomes of peripheral arterial disease: a population-based cohort study. *CMAJ Open* 2016. DOI:10.9778/cmajo.20150107

Copyright © 2016 The Author(s) or their employer(s).

To receive this resource in an accessible format, please contact us at [cmajgroup@cmaj.ca](mailto:cmajgroup@cmaj.ca).

|  |  |                                                                                                                                                                                                             |
|--|--|-------------------------------------------------------------------------------------------------------------------------------------------------------------------------------------------------------------|
|  |  | G865 G866 G099 R825 R826 R827 R833 R840 R841 R843 R848<br>R851 Z450 Z451 Z452 G330 G331 G332 G861 G864 R852 R853<br>R854 R885 G082 G083 G085 G090 G091 G092 G093 G094 G095<br>G096 G294 G295 G333 H540 H740 |
|--|--|-------------------------------------------------------------------------------------------------------------------------------------------------------------------------------------------------------------|

CIHI-DAD = Canadian Institute for Health Information Discharge Abstract Database; ICD = *International Statistical Classification of Diseases*; OHIP = *Ontario Health Insurance Plan*; AAA = *abdominal aortic aneurysm*.
